# Supplementary material for: The Genomic Legacy of the Transatlantic Slave Trade in the Yungas Valley of Bolivia
Source: PLoS One. 2015 Aug 11;10(8):e0134129. doi: 10.1371/journal.pone.0134129 (PMC4532489; doi:10.1371/journal.pone.0134129)
Supplement: S7 Table — (XLSX) [file pone.0134129.s011.xlsx]

## Sheet: Table S7(A)
Table S7. Continental ancestry in Yungas (Bolivia) as obtained from ADMIXTURE (standard deviations are given in brackets), plus maximum and minimum value of African, European or American ancestry for each population.
		CONTINENTAL ANCESTRY
		AVERAGE AND STANDARD DEVIATION				MAXIMUM VALUE				MINIMUM VALUE
		Africa	Europe	America		Africa	Europe	America		Africa	Europe	America
Ancestral population	Africa (n = 105)	0.918 (0.079)	0.038 (0.064)	0.044 (0.056)		1	0.287	0.197		0.71	0	0
	Europe (n = 158)	0.034 (0.049)	0.862 (0.107)	0.104 (0.098)		0.209	1	0.456		0	0.538	0
	America (n = 64)	0.026 (0.042)	0.065 (0.098)	0.909 (0.116)		0.162	0.39	1		0	0	0.465
Study population	Yungas (n = 105 )	0.124 (0.247)	0.118 (0.117)	0.758 (0.281)		0.782	0.615	1		0	0	0.009
	Yungas without Tocaña (n = 86)	0.028 (0.090)	0.113 (0.121)	0.858 (0.144)		0.59	0.615	1		0	0	0.335
	Tocaña (n = 19)	0.558 (0.268)	0.137 (0.097)	0.304 (0.303)		0.782	0.283	1		0	0	0.009

## Sheet: Table S7(B)
Gende bias as infered from uni and bi-parental markers. Data used for histograms in Figure 3(C).
	Absolute frequencies (uniparental markers)
	Marker	Location	African	Native American	European	n	Reference
	mtDNA	Bolivia	7	709	3	719	Taboada-Echalar et al. (2013)
		Yungas	19	85	1	105	Present Study
		Tocaña	16	3	0	19	Present Study
	Y-Chromosome	Bolivia	14	64	148	226	Cárdenas et al. (2014)
		Yungas	4	7	37	48	Cárdenas et al. (2014)
		Tocaña	4	2	3	9	Cárdenas et al. (2014)
	AIMs	Bolivia	0.029	0.777	0.195	598	Recomputed from Taboada-Echalar et al. (2013)
		Yungas	0.124	0.758	0.118	105	Present Study
		Tocaña	0.558	0.304	0.137	19	Present Study
	Relative frequencies
	Marker	Location	African	Native American	European	n	Reference
	mtDNA	Bolivia	0.01	0.986	0.004	719	Taboada-Echalar et al. (2013)
		Yungas	0.181	0.81	0.01	105	Present Study
		Tocaña	0.842	0.158	0	19	Present Study
	Y-Chromosome	Bolivia	0.062	0.283	0.655	226	Cárdenas et al. (2014)
		Yungas	0.083	0.146	0.771	48	Cárdenas et al. (2014)
		Tocaña	0.444	0.222	0.333	9	Cárdenas et al. (2014)
	AIMs	Bolivia	0.029	0.777	0.195	598	Recomputed from Taboada-Echalar et al. (2013)
		Yungas	0.124	0.758	0.118	105	Present Study
		Tocaña	0.558	0.304	0.137	19	Present Study
